# 1 **Stimulation Artifact Source Separation (SASS) for assessing** 2 **electric brain oscillations during transcranial alternating** 3 **current stimulation (tACS)**

4  
5 David Haslacher<sup>1</sup>, Khaled Nasr<sup>1</sup>, Stephen E. Robinson<sup>2</sup>, Christoph Braun<sup>3,4</sup>, and Surjo R. Soekadar<sup>1,5\*</sup>

6  
7 <sup>1</sup> Clinical Neurotechnology Lab, Neuroscience Research Center (NWFZ), Department of Psychiatry and  
8 Psychotherapy, Charité – University Medicine Berlin, Berlin, Germany

9 <sup>2</sup> National Institute of Mental Health (NIMH), MEG Core Facility, Bethesda, USA

10 <sup>3</sup> MEG Center, University of Tübingen, Germany

11 <sup>4</sup> CIMEC, Center of Mind/Brain Sciences, University of Trento, Italy

12 <sup>5</sup> Applied Neurotechnology Lab, Department of Psychiatry and Psychotherapy, University Hospital of  
13 Tübingen, Germany

14  
15 \* Correspondence to: Surjo R. Soekadar, MD, Clinical Neurotechnology Lab, Neuroscience Research  
16 Center (NWFZ), Department of Psychiatry and Psychotherapy, Charité – University Medicine Berlin,  
17 Charitéplatz 1, 10117 Berlin, Germany. Email: [surjo.soekadar@charite.de](mailto:surjo.soekadar@charite.de)

18  
19 **Keywords:** brain oscillations, single-trial, transcranial alternating current stimulation (tACS),  
20 stimulation artifact, electroencephalography (EEG)

## 21 22 **Highlights:**

- 23 - Stimulation Artifact Source Separation (SASS), a real-time compatible signal decomposition  
24 algorithm for separating electric brain activity and stimulation signal artifacts related to  
25 amplitude-modulated transcranial alternating current stimulation (AM-tACS), is introduced
- 26 - Employing SASS, phase and amplitude of single-trial steady state visual evoked potentials  
27 (SSVEPs) were reliably recovered from electroencephalography (EEG) recordings at the  
28 frequency targeted with AM-tACS
- 29 - SASS enables assessment of single-trial oscillatory brain activity at the target frequency during  
30 stimulation and paves the way for online adaptation of stimulation parameters to ongoing brain  
31 oscillations

32

## 33 **Abstract**

34 Brain oscillations, e.g. measured by electro- or magnetoencephalography (EEG/MEG), are causally  
35 linked to brain functions that are fundamental for perception, cognition and learning. Recent advances in  
36 neurotechnology provide means to non-invasively target these oscillations using frequency-tuned  
37 amplitude-modulated transcranial alternating current stimulation (AM-tACS). However, online  
38 adaptation of stimulation parameters to ongoing brain oscillations remains an unsolved problem due to  
39 stimulation artifacts that impede such adaptation, particularly at the target frequency. Here, we introduce  
40 a real-time compatible artifact rejection algorithm (Stimulation Artifact Source Separation, SASS) that  
41 overcomes this limitation. SASS is a spatial filter (linear projection) removing EEG signal components  
42 that are maximally different in the presence versus absence of stimulation. This enables the reliable  
43 removal of stimulation-specific signal components, while leaving physiological signal components  
44 unaffected. For validation of SASS, we evoked brain activity with known phase and amplitude using 10  
45 Hz visual flickers across 7 healthy human volunteers. 64-channel EEG was recorded during and in  
46 absence of 10 Hz AM-tACS targeting the visual cortex. Phase differences between AM-tACS and the  
47 visual stimuli were randomized, so that steady-state visually evoked potentials (SSVEPs) were phase-  
48 locked to the visual stimuli but not to the AM-tACS signal. For validation, distributions of single-trial  
49 amplitude and phase of EEG signals recorded during and in absence of AM-tACS were compared for  
50 each participant. When no artifact rejection method was applied, AM-tACS stimulation artifacts impeded  
51 assessment of single-trial SSVEP amplitude and phase. Using SASS, amplitude and phase of single trials  
52 recorded during and in absence of AM-tACS were comparable. These results indicate that SASS can be  
53 used to establish adaptive (closed-loop) AM-tACS, a potentially powerful tool to target various brain  
54 functions, and to investigate how AM-tACS interacts with electric brain oscillations.

55

## 56 **1. Introduction**

57 Brain oscillations reflect neuronal cell-assembly formation causally linked to various brain functions,  
58 such as perception (Fries, Schroder, Roelfsema, Singer, & Engel, 2002; Hipp, Engel, & Siegel, 2011;  
59 Rodriguez et al., 1999), cognition (Kahana, Sekuler, Caplan, Kirschen, & Madsen, 1999), memory (Fell  
60 et al., 2001) and learning (Miltner, Braun, Arnold, Witte, & Taub, 1999; Seager, Johnson, Chabot, Asaka,  
61 & Berry, 2002). While building on fine-tuned neurochemical processes at the cellular level, brain  
62 oscillations were found to be closely related to cortico-cortical communication at the neural circuit and

63 system level (Kopell, Ermentrout, Whittington, & Traub, 2000; Roelfsema, Engel, Konig, & Singer,  
64 1997). As such, brain oscillations assessed by electro- or magnetoencephalography (EEG/MEG) may  
65 represent a valuable target to treat neurological and psychiatric disorders in which phase synchronization  
66 and large-scale integration is disturbed, e.g. Parkinson's disease, depression or schizophrenia.

67

68 A well-established tool to non-invasively target oscillatory brain activity uses transcranial alternating  
69 currents specifically tuned to physiological frequencies, e.g. in the alpha (8-15 Hz) or beta band (15-30  
70 Hz). When targeting such frequencies, distinct effects on perception (Helfrich et al., 2014; Thut et al.,  
71 2017), movement (Wach et al., 2013), memory (Reinhart & Nguyen, 2019) or emotion regulation  
72 (Clancy et al., 2018) were demonstrated. While very promising in its application (Helfrich et al., 2014;  
73 Thut, Schyns, & Gross, 2011), tuning of stimulation parameters to ongoing brain oscillations (e.g.  
74 frequency, phase, intensity, and spatial distribution of the electric fields using multi-electrode montages)  
75 was unfeasible up to now because stimulation artifacts impede reliable reconstruction of physiological  
76 brain activity. Typically, the largest tACS artifact appears at the target frequency at which energy density  
77 is highest. A complicating issue relates to nonlinear modulations of this artifact by non-physiological  
78 (such as hardware- or signal processing-related) and physiological processes (such as heartbeat and  
79 respiration) (Noury, Hipp, & Siegel, 2016; Noury & Siegel, 2017b). These result in additional stimulation  
80 artifacts at other frequencies including second- and higher-order intermodulation distortions. Despite the  
81 development of a variety of tACS artifact suppression strategies such as template subtraction (Helfrich  
82 et al., 2014), adaptive filtering (Kohli & Casson, 2019), spatial filtering using beamforming (Neuling,  
83 Ruhnau, Weisz, Herrmann, & Demarchi, 2017) or signal-space projection (Vosskuhl, Mutanen, Neuling,  
84 Ilmoniemi, & Herrmann, 2019), there is currently no established artifact suppression strategy available  
85 that allows for real-time tuning of tACS stimulation parameters to the targeted brain oscillation. This not  
86 only limits effective targeting of ongoing brain oscillations, but also the possibility to systematically  
87 investigate how tACS interacts with endogenous rhythmic brain activity, a critical prerequisite to develop  
88 new and effective closed-loop adaptive brain stimulation protocols.

89

90 Recently, we have introduced a novel tACS approach that uses amplitude modulation of a high frequency  
91 carrier signal (e.g. 220 Hz) to reduce stimulation-related artifacts at the lower physiological frequency  
92 bands (Witkowski et al., 2016). By modulating the carrier signal's amplitude at a physiological frequency  
93 (target frequency), specific brain functions could be influenced, e.g. working memory performance when  
94 targeting frontal midline theta (FMT) oscillations (Chander et al., 2016). This finding was corroborated

95 by computational simulations showing that AM-tACS leads to phase-locking of cortical oscillations with  
96 the stimulation signal and suggests that AM-tACS exhibits the same target engagement mechanism as  
97 conventional (unmodulated) low frequency tACS (Negahbani, Kasten, Herrmann, & Fröhlich, 2018),  
98 although possibly requiring higher current density. While AM-tACS can substantially reduce stimulation  
99 artifact contamination of the targeted physiological frequency band, similar to conventional tACS,  
100 nonlinearities related to non-physiological and physiological processes (Noury et al., 2016; Noury &  
101 Siegel, 2017b) as well as intermodulation distortions could be mistaken for neural entrainment (Kasten,  
102 Negahbani, Fröhlich, & Herrmann, 2018). It would be thus important to establish an approach that  
103 efficiently separates endogenous brain activity at the target frequency from signal components related to  
104 AM-tACS artifacts.

105  
106 Here, we introduce Stimulation Artifact Source Separation (SASS), a real-time-compatible signal  
107 decomposition algorithm, that allows for separating electric brain activity and AM-tACS stimulation  
108 artifacts. To test validity and reliability of SASS, brain oscillations with known amplitude and phase  
109 were evoked using a 10 Hz steady-state visual evoked potential (SSVEP) paradigm. Brain oscillations  
110 were recorded by 64-channel EEG while 10-Hz AM-tACS was applied over the visual cortex. In each  
111 trial, phase of AM-tACS relative to the visual flicker was randomly selected, such that the artifact  
112 eliminated the consistent phase relationship (phase locking) between the flicker and EEG signal. **Using**  
113 **SASS, we successfully recovered single-trial phase and amplitude information of SSVEPs across six**  
114 **healthy human volunteers.**

115

## 116 **2. Material and Methods**

### 117 **2.1 Stimulation Artifact Source Separation (SASS)**

#### 118 **2.1.1 Overview**

119 SASS is a spatial filter applied to encephalographic data contaminated by transcranial electric stimulation  
120 (tES) artifacts. SASS is computed from two covariance matrices, obtained from data bandpass filtered  
121 around the stimulation frequency during AM-tACS and in absence of AM-tACS. SASS is computed  
122 from and applied to the full-length recordings before any further analysis. It should be noted that,  
123 depending on the signal of interest, the SASS projection matrix  $\mathbf{P}$  can be applied to the filtered or  
124 unfiltered data. In the present work, we apply  $\mathbf{P}$  to the filtered data for single-trial SSVEP analysis as  
125 well as to broadband data for power spectral analysis. The entire procedure is outlined in Figure 1.

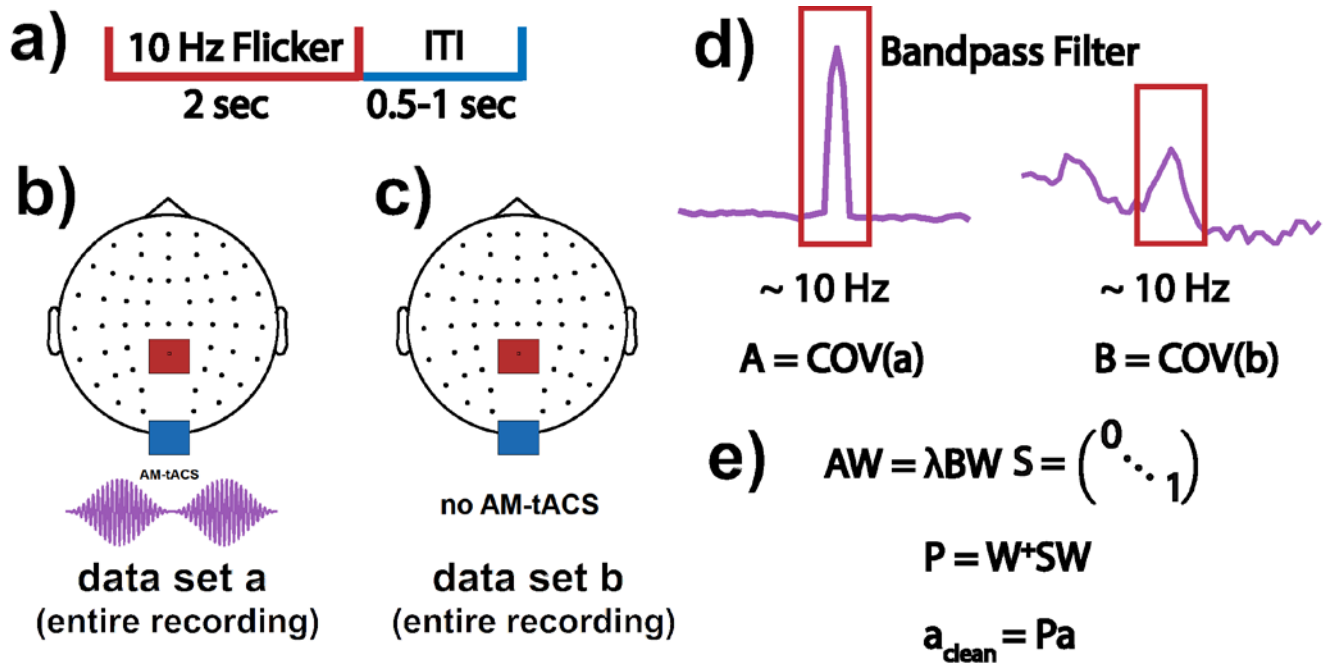

126

127 **Figure 1: Depiction of applying Stimulation Artifact Source Separation (SASS) to**  
 128 **electroencephalographic (EEG) data.** Initially, EEG data is recorded during the paradigm of interest  
 129 (A) (e.g., a 10-Hz steady-state visually evoked potentials, SSVEP, paradigm) while amplitude-modulated  
 130 transcranial alternating current stimulation (AM-tACS) is applied (B) or not applied (C). These full-  
 131 length recordings are then bandpass filtered around the target frequency (i.e., 10 Hz), and their  
 132 narrowband covariance matrices A and B are computed (D). Finally, the SASS projection matrix P is  
 133 computed from a joint diagonalization of A and B and applied to the data before any further processing  
 134 (E).

135

### 136 2.1.2 Mathematical principles

137 SASS identifies hidden and linearly separable data components that are maximally attributable to  
 138 transcranial electric stimulation and least attributable to brain activity. These components are then  
 139 rejected to achieve stimulation artifact suppression. SASS is based on a generalized eigenvalue  
 140 decomposition (joint diagonalization) of encephalographic covariance matrices during and in absence of  
 141 stimulation. It was shown that using an eigenvalue decomposition of the covariance matrix for Signal-  
 142 Space Projection (SSP) (Uusitalo & Ilmoniemi, 1997) can be used to suppress tACS artifacts (Voskuhl  
 143 et al., 2019), but this approach is agnostic to the spatial distribution of physiological brain activity  
 144 possibly limiting performance of artifact removal. In SSP, the data matrix becomes linearly separated  
 145 into orthogonal signal and noise subspaces. This is equivalent to an eigenvalue decomposition of the

146 covariance matrix  $\mathbf{A}$ , where the resulting components  $\mathbf{w}_i$  (which are orthogonal) can be ordered by the  
147 amount of variance  $\lambda_i$  they explain:

$$\mathbf{W} = \begin{pmatrix} \mathbf{w}_{1^T} \\ \vdots \\ \mathbf{w}_{n^T} \end{pmatrix} \text{ where } \mathbf{A}\mathbf{w}_i = \lambda_i\mathbf{w}_i \quad (1)$$

148 The matrix  $\mathbf{P}$  can then be constructed, which projects the data onto the vector subspace (“signal space”)  
149 orthogonal to the top few components explaining the most variance (“noise space”). This can be written  
150 as a separation of the data into latent components, followed by a zeroing out of undesired components  
151 and a projection back into the original sensor space:

$$\mathbf{P} = \mathbf{W}^{-1}\mathbf{S}\mathbf{W} \text{ where } \mathbf{S} = \begin{pmatrix} 0 & & \\ & \ddots & \\ & & 1 \end{pmatrix} \quad (2)$$

154 To account for the spatial distribution of physiological brain activity, SASS was designed to identify  
155 components that jointly maximize the variance attributable to stimulation artifacts and minimize the  
156 variance attributable to brain activity. In SASS, a source separation matrix is computed from the joint  
157 diagonalization of EEG sensor covariance matrices during ( $\mathbf{A}$ ) and in absence of stimulation ( $\mathbf{B}$ ),  
158 respectively:  
159

$$\mathbf{W} = \begin{pmatrix} \mathbf{w}_{1^T} \\ \vdots \\ \mathbf{w}_{n^T} \end{pmatrix} \text{ where } \mathbf{A}\mathbf{w}_i = \lambda_i\mathbf{B}\mathbf{w}_i \text{ and } \lambda_i = \frac{\mathbf{w}_i^T\mathbf{A}\mathbf{w}_i}{\mathbf{w}_i^T\mathbf{B}\mathbf{w}_i} \quad (3)$$

161 The ratio  $\lambda_i$  represents the ratio of signal power of component  $i$  during tACS relative to in absence of  
162 tACS. Like SSP, SASS can be summarized in a single linear projection:  
163

$$\mathbf{P} = \mathbf{W}^+\mathbf{S}\mathbf{W} \text{ where } \mathbf{S} = \begin{pmatrix} 0 & & \\ & \ddots & \\ & & 1 \end{pmatrix} \text{ and } \mathbf{W}^+ \text{ denotes the pseudoinverse of } \mathbf{W} \quad (4)$$

166 This approach is related to spatio-spectral decomposition (Nikulin, Nolte, & Curio, 2011), which also  
167 involves a joint diagonalization of covariance matrices. Like SASS, SSD computes a spatial filter which  
168 aims to increase the signal-to-noise ratio of narrowband EEG activity. Different to SASS, SSD contrasts  
169

170 the covariance in the target frequency band against the covariance in neighboring frequency bands. This  
171 distinguishes it from SASS, where covariances computed within the same frequency band during and in  
172 absence of AM-tACS are contrasted. Importantly, in SASS a certain number of components must be  
173 chosen for stimulation artifact rejection. We minimize residual artifacts by selecting the number of  
174 components that minimizes the difference in signal power at the target frequency (as measured by mean  
175 squared error across all channels (Kasten et al., 2018) between cleaned data recorded during AM-tACS  
176 and data recorded in absence of AM-tACS).

177

## 178 **2.2 Electroencephalography (EEG)**

179 A 64-channel EEG system (Bittium Corp., Oulu, Finland) with passive Ag/AgCl electrodes (Brain  
180 Products GmbH, Gilching, Germany) was used to record electrical activity on the scalp. The amplifier  
181 was set to DC-mode with a dynamic range of +/-430 V, a resolution of 51 nV/bit, and a range of 24 bit.  
182 Electrode impedances were kept below 10 kOhm. Signals were sampled at 500 Hz with an anti-aliasing  
183 filter applied at 125 Hz. Saturated electrodes were excluded from the analysis. Electrodes exhibiting  
184 broadband power more than two orders of magnitude higher than the median in the condition without  
185 AM-tACS were excluded from the analysis.

186

## 187 **2.3 Transcranial alternating current stimulation (tACS)**

188 AM-tACS was applied to the scalp using a commercial stimulator (NeuroConn GmbH, Ilmenau,  
189 Germany). Rubber electrodes with a 4 x 5 cm size were placed over position CPz and on the inion  
190 according to the international 10-20 system. This corresponds to the standard montage used for targeting  
191 the visual system during tACS experiments (e.g., Helfrich et al., 2014). The stimulator delivered AM-  
192 tACS with a 220 Hz carrier and 10 Hz envelope signal. Stimulation intensity was set to a peak-to-peak  
193 amplitude of 2 mA.

194

## 195 **2.4 Presentation of visual flickers**

196 During ongoing AM-tACS, a sinusoidal grating that flickered at 10 Hz was presented for 2 seconds  
197 across trials. A random inter-trial interval between 0.5 to 1 second ensured that the onset time of the  
198 visual flicker was randomly distributed over the phase of the AM-tACS signal. Visual stimuli were  
199 presented via a head-mounted display (Oculus VR Inc., California, USA). Its analog audio output was  
200 fed into a bipolar channel of the EEG amplifier and stored to obtain a trigger marker of the stimulus onset



201 time. Jitter between the audio output signal and visual stimulus presentation was under 5 ms. Before the  
202 experiment, signal artifacts related to the use of the head-mounted display were ruled out.

203

## 204 **2.5 Participants and sessions**

205 Seven healthy participants (4 male, 3 female, 22 - 28 years old) were invited to participate in the study  
206 and provided written informed consent. The study was approved by the ethics committee of the Charité  
207 – University Medicine Berlin (EA1/077/18). Initially, a calibration session consisting of 200 trials of  
208 visual flicker was recorded in absence of AM-tACS. Then, a session of 200 trials of visual flickers was  
209 recorded while AM-tACS was applied. Recording time for each participant amounted to approximately  
210 20 minutes. One participant was excluded due to a lack of discernible SSVEPs in absence of AM-tACS.

211

## 212 **2.6 Electroencephalographic (EEG) data processing**

213 MNE-Python (Gramfort et al., 2013) was used for the entire analysis. To obtain a representative channel,  
214 unless otherwise specified, analyses were applied to a virtual channel computed from the average of all  
215 available occipital electrodes (after SASS, if applied).

216

### 217 **2.6.1 Stimulation Artifact Source Separation (SASS)**

218 EEG data in absence and during AM-tACS were bandpass filtered around the stimulation frequency from  
219 9 – 11 Hz using finite impulse response (FIR) filters designed via the Hamming window method  
220 (Saramaeki, Mitra, & Kaiser, 1993). The empirical covariance matrix of both unsegmented datasets was  
221 then used to compute SASS (Fig. 1 and Section 2.1.2).

222

### 223 **2.6.2 Power spectra**

224 To compute power spectra (Fig. 3), Welch periodograms over the entire unfiltered datasets (with or  
225 without application of SASS) using 2048 fast Fourier transform (FFT) points were used. To compute  
226 high-resolution power spectra (Fig. S5), we followed the procedure of (Noury et al., 2016). We split the  
227 entire recordings into 120 second segments and computed Thompson's multitaper power spectral density  
228 (PSD) estimates (0.05 Hz bandwidth, NW=6) for each segment.

229

### 230 **2.6.3 Modulations of stimulation artifacts by heartbeat**

231 Following (Noury et al., 2016), we assessed modulations of the AM-tACS artifact by heartbeat in the  
232 time domain. We FIR filtered the data from 5 – 15 Hz and applied the Hilbert transform to obtain the



233 signal envelope. Then, we windowed the data into 4 second segments centered on electrocardiogram  
234 (ECG) R-peaks. We subtracted the temporal mean from each segment and tested for a significant  
235 modulation at each timepoint using a permutation test. We compared the average envelope around an R-  
236 peak to the average envelopes computed using 1000 random placements of the segments. The resulting  
237 p-values were Bonferroni-corrected for multiple comparisons. The permutation test was computed for  
238 every channel.

239

#### 240 **2.6.4 Single-trial amplitude and phase**

241 To compute single-trial amplitude and phase, the unsegmented bandpass filtered EEG data was Hilbert  
242 transformed. Then, the data was segmented into 2 second trials corresponding to the presentation of each  
243 visual flicker. Finally, instantaneous amplitude and phase difference between EEG and flicker was  
244 computed for each timepoint and averaged within each trial to obtain a single data point per trial. For  
245 visualization, the mean phase angle across trials was subtracted.

246

#### 247 **2.7 Statistical procedures**

248 To test whether single-trial amplitudes during AM-tACS without SASS were larger than in absence of  
249 AM-tACS, we employed a one-sided t-test for independent samples. To test whether single-trial  
250 amplitudes during AM-tACS with SASS were smaller than during AM-tACS without SASS, we  
251 employed a one-sided t-test for dependent samples. To test whether single-trial amplitudes during AM-  
252 tACS with SASS were different from single-trial amplitudes in absence of AM-tACS (i.e. whether any  
253 residual artifacts remained after SASS), we employed a two-sided t-test for independent samples. A  
254 power analysis revealed that an effect size of 0.281 (Cohen's d) could be detected with 0.8 power at the  
255 employed alpha level of 0.05, meaning that a difference in means (residual artifact) of between 0.174  
256 and 0.972  $\mu\text{V}$  (depending on the standard deviations of single-trial amplitudes within a subject) could be  
257 detected.

258

259 Analogously to the case of single-trial amplitudes, we employed Wallraff tests (Zar, 1999) for dependent  
260 or independent samples to test for differences in single-trial phases (relative to the visual flicker) within  
261 each subject. In the dependent samples case, angular distances were compared using a Wilcoxon rank-  
262 sum test. In the independent samples case, angular distances were compared using a Mann-Whitney U  
263 test. Phase locking values and mean single-trial amplitudes at the group level were statistically compared  
264 using one- or two-sided Wilcoxon rank-sum tests.

265 To test for differences in single-trial amplitude between conditions across the entire sensor space, spatial  
266 cluster-based permutation tests with threshold-free cluster enhancement (Smith & Nichols, 2009) were  
267 computed individually for each participant. For each sensor and participant, 200 data points  
268 corresponding to the SSVEP trials were used.

269

### 270 3. Results

271

#### 272 3.1 SASS recovered the power spectrum and topography of electric brain oscillations

273 Fig. 2 depicts successful recovery of the occipital power spectrum and SSVEP amplitude topography  
274 during AM-tACS using SASS. Of note, a clear peak in the power spectrum at 10 Hz remained due to  
275 steady-state visual stimuli presented at 10 Hz. To test for differences in the spatial distribution of SSVEP  
276 amplitude between EEG recorded in absence of AM-tACS and EEG recorded during AM-tACS, spatial  
277 cluster-based permutation tests were performed individually for each participant. No significant  
278 difference (i.e., residual artifact) was detected for any of the participants.

279

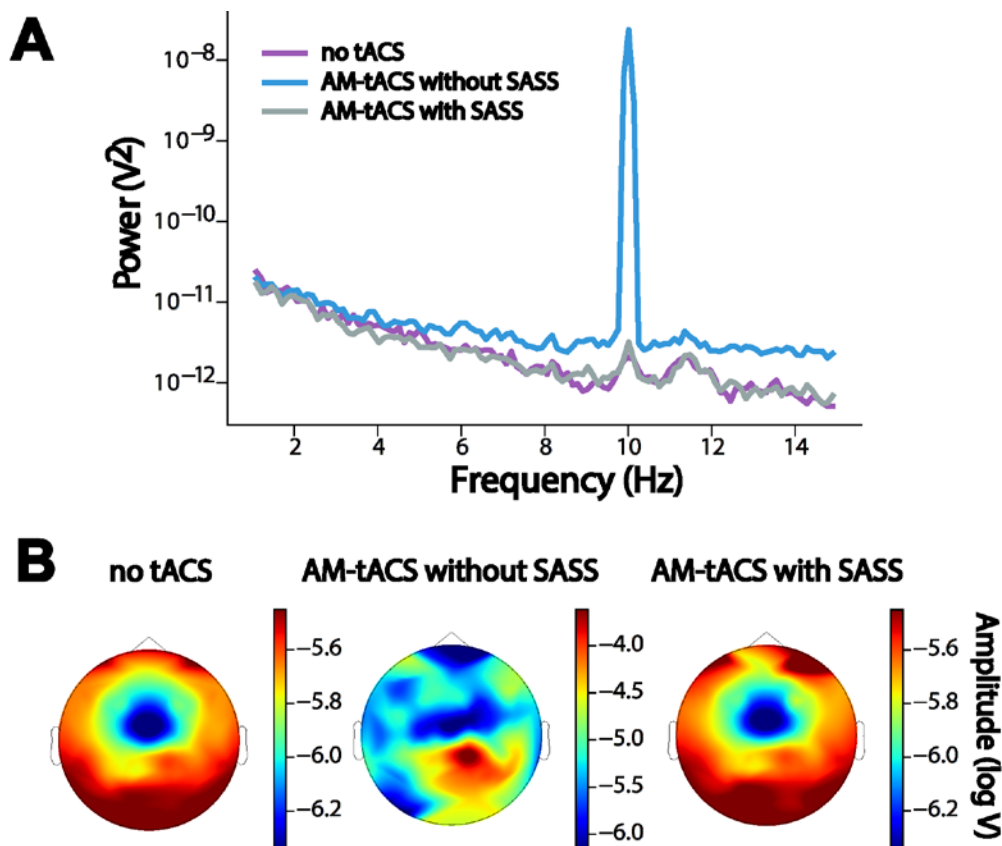

280

281 **Figure 2: Power spectrum and steady-state visual evoked potential (SSVEP) topography during**  
282 **and in absence of amplitude-modulated transcranial alternating current stimulation (AM-tACS)**  
283 **using Stimulation Artifact Source Separation (SASS) in a representative participant.** A: Without  
284 SASS, the AM-tACS artifact masked brain activity in the power spectrum at occipital electrodes,  
285 including the peak related to SSVEPs at 10 Hz. Using SASS, the physiological power spectrum was  
286 recovered. B: Without SASS, the AM-tACS artifact masked the topography of SSVEPs. With SASS, the  
287 SSVEP topography was recovered.

288

### 289 **3.2 SASS recovered single-trial amplitude and phase of electric brain oscillations**

290 Fig. 3 depicts recovery of individual SSVEP traces by SASS. Single-trial SSVEP amplitude was  
291 significantly increased (by multiple orders of magnitude) during AM-tACS when compared to SSVEP  
292 amplitudes recorded in absence of AM-tACS. Applying SASS, across all participants, SSVEP  
293 amplitudes during AM-tACS was comparable to SSVEP amplitudes recorded in absence of AM-tACS  
294 (Fig. 4A, Table 1). A power analysis revealed that, using SASS, a difference in means (residual artifact)  
295 of above 0.174 and 0.972  $\mu\text{V}$ , respectively (depending on the variances of single-trial amplitudes within  
296 a subject), could have been detected (see Section 2.7). Single-trial SSVEP phase (relative to the visual  
297 flicker) was significantly distorted during AM-tACS compared to data recorded in absence of AM-tACS.  
298 Using SASS, single-trial SSVEP phase during AM-tACS was not different from single-trial SSVEP  
299 phase recorded in absence of AM-tACS (Fig. 4B, Table 2). Figs. S3 and S4 depict the results seen in Fig.  
300 4 for all study participants.

## 10 Hz SSVEP - Single Trial Traces

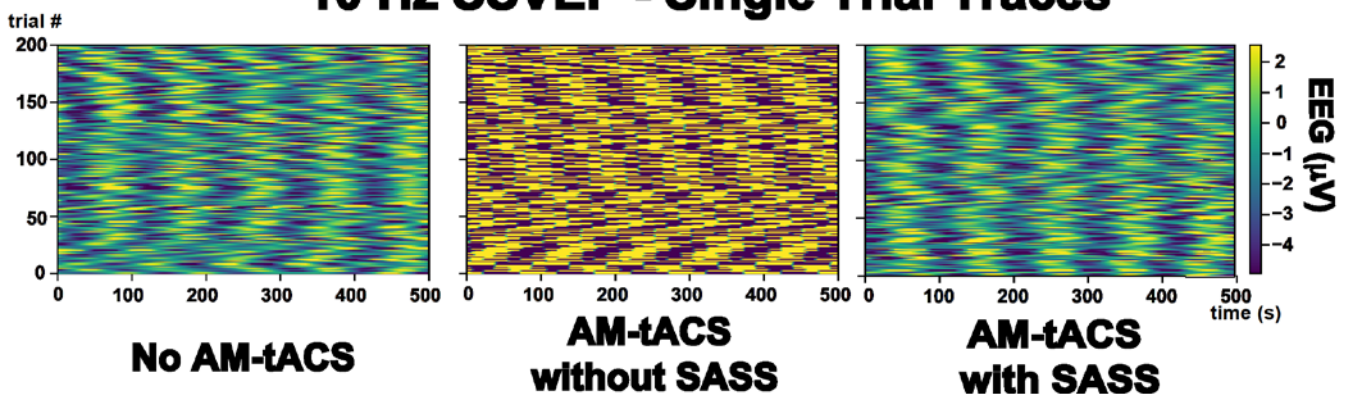

302 **Figure 3: Single-trial steady-state visual evoked potentials (SSVEPs) in absence and during**  
303 **amplitude-modulated transcranial alternating current stimulation (AM-tACS) at the target**  
304 **frequency (10 Hz) with and without using Stimulation Artifact Source Separation (SASS) in a**

305 **representative participant.** In absence of AM-tACS, 10 Hz SSVEPs can be easily identified in single-  
306 trial traces of electroencephalographic (EEG) activity (left). When applying AM-tACS targeting the  
307 same frequency, i.e. 10 Hz, the AM-tACS artifact masks physiological activity. After applying SASS to  
308 EEG data recorded during AM-tACS, physiological single-trial SSVEP activity is recovered.  
309

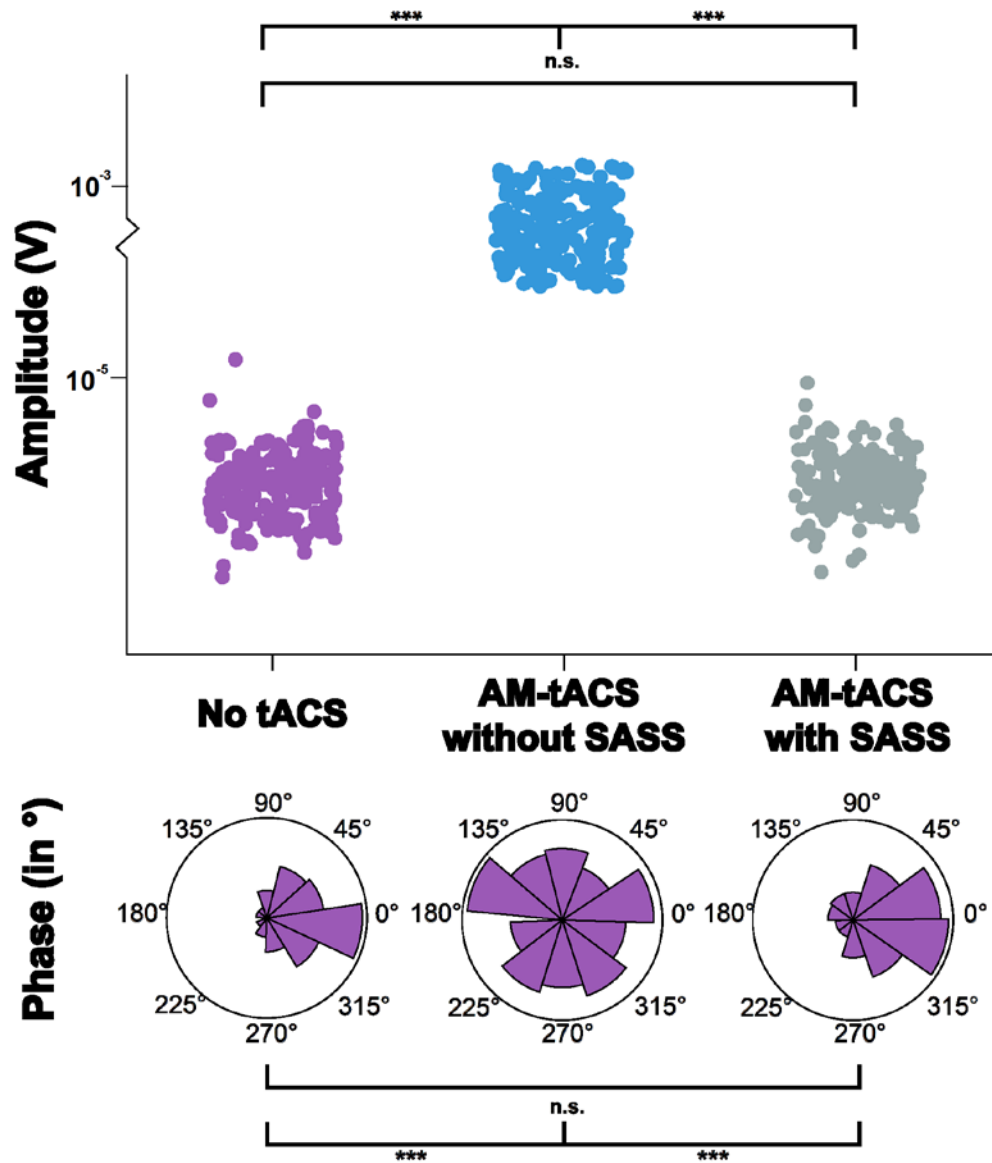

310  
311 **Figure 4: Single-trial amplitude (A) and phase (B) of steady-state visual evoked potentials**  
312 **(SSVEPs) during and in absence of amplitude-modulated transcranial alternating current**  
313 **stimulation (AM-tACS) using Stimulation Artifact Source Separation (SASS) in a representative**  
314 **participant.** A: Single-trial amplitude of electroencephalographic (EEG) data at 10 Hz recorded in  
315 absence and during AM-tACS using SASS. When applying SASS, single-trial amplitudes were

316 comparable to activity recorded in absence of AM-tACS. B: Single-trial phase of EEG data at 10 Hz  
317 recorded in absence and during AM-tACS relative to the phase of the visual flicker. When applying  
318 SASS, similar to absence of AM-tACS, single-trial phase was locked to the visual flicker during AM-  
319 tACS.

320

321 **Table 1. Single-trial amplitude of steady-state visual evoked potentials (SSVEPs) across all**  
322 **participants.** Two-sided t-tests (for dependent or independent samples, as applicable) were used for  
323 pairwise comparisons of single-trial amplitudes between conditions. Mean (and standard deviations) are  
324 reported.

325

| Participant | EEG amplitude in absence of tACS ( $\mu\text{V}$ ) | EEG amplitude during tACS without SASS ( $\mu\text{V}$ ) | EEG amplitude during tACS with SASS ( $\mu\text{V}$ ) | P-value (absence of tACS vs. tACS without SASS) | P-value (tACS without SASS vs. tACS with SASS) | P-value (absence of tACS vs. tACS with SASS) |
|-------------|----------------------------------------------------|----------------------------------------------------------|-------------------------------------------------------|-------------------------------------------------|------------------------------------------------|----------------------------------------------|
| 1           | 3.13 (0.652)                                       | 27.3 (1.21)                                              | 3.19 (0.689)                                          | <0.001                                          | <0.001                                         | 0.396                                        |
| 2           | 7.70 (3.47)                                        | 81.9 (30.0)                                              | 8.20 (3.45)                                           | <0.001                                          | <0.001                                         | 0.149                                        |
| 3           | 2.85 (0.980)                                       | 89.4 (2.82)                                              | 2.90 (0.686)                                          | <0.001                                          | <0.001                                         | 0.605                                        |
| 4           | 5.60 (1.53)                                        | 799 (211)                                                | 5.57 (1.31)                                           | <0.001                                          | <0.001                                         | 0.832                                        |
| 5           | 5.73 (2.28)                                        | 13.2 (3.56)                                              | 5.92 (1.56)                                           | <0.001                                          | <0.001                                         | 0.371                                        |
| 6           | 2.38 (0.679)                                       | 23.2 (0.871)                                             | 23.1 (0.562)                                          | <0.001                                          | <0.001                                         | 0.309                                        |

326

327 **Table 2. Single-trial phase of steady-state visual evoked potentials (SSVEPs) across all**  
328 **participants.**

329 Wallraff tests (for dependent or independent samples, as applicable) were used for pairwise comparisons  
330 of the distribution of SSVEP-flicker phase differences between conditions. Phase locking value (PLV)  
331 is reported.

332

| Participant | Phase locking in absence of tACS (PLV) | Phase locking during tACS without SASS (PLV) | Phase locking during tACS with SASS (PLV) | P-value (absence of tACS vs tACS without SASS) | P-value (tACS without SASS vs tACS with SASS) | P-value (absence of tACS vs tACS with SASS) |
|-------------|----------------------------------------|----------------------------------------------|-------------------------------------------|------------------------------------------------|-----------------------------------------------|---------------------------------------------|
| 1           | 0.457                                  | 0.0437                                       | 0.350                                     | <0.001                                         | <0.001                                        | 0.0974                                      |
| 2           | 0.181                                  | 0.046                                        | 0.217                                     | <0.05                                          | <0.05                                         | 0.533                                       |
| 3           | 0.536                                  | 0.0131                                       | 0.412                                     | <0.001                                         | <0.001                                        | 0.160                                       |
| 4           | 0.531                                  | 0.0355                                       | 0.531                                     | <0.001                                         | <0.001                                        | 0.609                                       |
| 5           | 0.479                                  | 0.0900                                       | 0.371                                     | <0.001                                         | <0.001                                        | 0.346                                       |
| 6           | 0.268                                  | 0.0458                                       | 0.252                                     | <0.01                                          | <0.05                                         | 0.936                                       |

333

334 **3.3 Stimulation Artifact Source Separation (SASS) recovered mean amplitude and phase locking**  
335 **value (PLV) of electric brain oscillations at the group level**

336

337 Fig. 5 depicts summary statistics of the performance of SASS at group level. Mean amplitudes of 10 Hz  
338 activity during AM-tACS ( $172 \pm 282 \mu\text{V}$ ) were significantly higher compared EEG data recorded in  
339 absence of AM-tACS ( $4.57 \pm 1.92 \mu\text{V}$ ). We found no difference in 10 Hz activity in data recorded in  
340 absence and during AM-tACS when applying SASS ( $4.68 \pm 2.07 \mu\text{V}$ ). Phase locking between EEG data  
341 and visual flickers (Fig. 5B) decreased during AM-tACS ( $0.0456 \pm 0.0228 \text{ PLV}$ ) compared to EEG data  
342 recorded in absence of AM-tACS ( $0.409 \pm 0.135 \text{ PLV}$ ). When applying SASS, phase locking between  
343 EEG data and visual flickers was not different during AM-tACS compared to EEG data recorded in  
344 absence of stimulation ( $0.355 \pm 0.103 \text{ PLV}$ ).

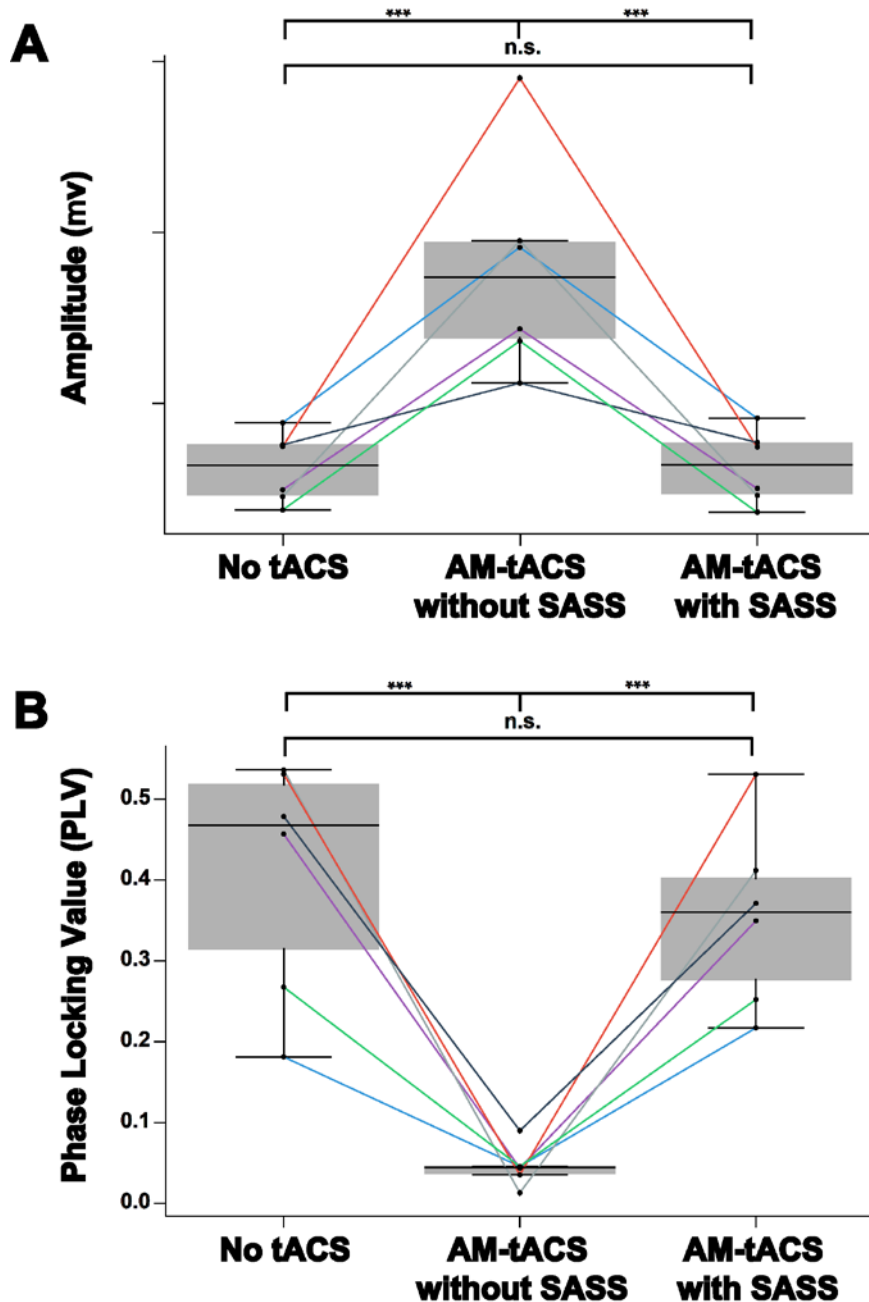

345

346

347 **Figure 5: Restoration of amplitude and phase of steady-state visual evoked potentials (SSVEPs)**  
348 **using Stimulation Artifact Source Separation (SASS) at group level.** A: When not applying SASS,  
349 mean single-trial amplitudes of 10 Hz electroencephalographic (EEG) activity increased indicating  
350 artifact distortions. When applying SASS, mean single-trial 10 Hz EEG amplitudes during amplitude-  
351 modulated transcranial alternating current stimulation (AM-tACS) were comparable to EEG data  
352 recorded in absence of stimulation. B: When not applying SASS, phase locking of 10 Hz EEG activity  
353 to the visual flicker decreased indicating artifact distortions of SSVEP. When applying SASS, phase



354 locking of 10 Hz EEG activity to the visual flicker was recovered. Data from occipital sensors of all six  
355 study participants is depicted.

356

### 357 **3.4 Properties of Stimulation Artifact Source Separation (SASS)**

358 Depending on the experimental design and purpose of study, there are a number of properties of SASS  
359 that users should consider. First, presumably due to spatially varying capacitive effects (Noury & Siegel,  
360 2017a), the topography of the AM-tACS artifact is frequency-dependent. Therefore, SASS must be  
361 computed separately for each frequency band of interest (Fig. S7). Second, the optimal number of  
362 components to reject (Section 2.1.2) may vary across participants. The eigenvalue spectrum and spatial  
363 patterns of rejected components across all subjects are visualized in Fig. S6. Third, applying a time- and  
364 frequency-domain analysis for a selected occipital channel across all study participants according to  
365 (Noury et al., 2016) did not evidence any demodulations including intermodulation distortions at the  
366 AM-tACS target frequency (Fig. S5). Fourth, due to time-varying covariances, SASS computed for one  
367 dataset should not be applied to another dataset. This may lead to sub-optimal performance (Fig. S8).  
368 Therefore, we advise to recompute SASS according to the covariance of the dataset it is applied to. This  
369 is particularly true for online applications, where recursive solutions to the underlying eigenvalue  
370 problem could be applied (Li, Yue, Valle-Cervantes, & Qin, 2000). Finally, SASS does not overcorrect  
371 the signals of interest when computed as usual but applied to the dataset in absence of AM-tACS. We  
372 have used a spatial cluster-based permutation test (Section 2.7) to verify that single-trial amplitudes are  
373 not attenuated in any of the study participants due to the application of SASS to data recorded in absence  
374 of AM-tACS.

375

## 376 **4. Discussion**

377 Up to now, there was no real-time compatible signal processing tool available for AM-tACS artifact  
378 suppression that allows for recovering phase and amplitude of evoked brain responses at a single-trial  
379 level. Here, we introduced SASS, a spatial filter based on a source separation matrix computed from joint  
380 diagonalization of EEG sensor covariance matrixes at the target frequency recorded in absence and  
381 during AM-tACS. To evaluate the effectiveness of SASS, we used a 10-Hz-SSVEP paradigm resulting  
382 in evoked oscillatory brain responses with known frequency, amplitude and phase. Electric brain activity  
383 was assessed using EEG across six healthy volunteers in absence and during AM-tACS targeting the  
384 SSVEP frequency. Using SASS, single-trial SSVEP amplitude and phase information was restored to

385 the level recorded in absence of stimulation (Fig. 4) across all study participants. Likewise, the SSVEP  
386 topography was successfully recovered (Fig. 3) across all study participants.

387 Besides showing that SASS is an effective tool for separating electric brain activity and stimulation  
388 artifacts at the frequency targeted by AM-tACS, our results pave the way for implementation of adaptive  
389 stimulation paradigms in which the phase, amplitude and spatial distribution of the applied electric field  
390 is adapted to ongoing brain oscillations. This may contribute to the development of more effective  
391 stimulation approaches to target various brain functions and further elucidate the underlying mechanisms  
392 of AM-tACS.

393

394 While 200 trials employed in the current study provide sufficient statistical power to detect residual  
395 artifacts of above 0.174 and 0.972  $\mu\text{V}$ , respectively, (Section 2.7) averaging of instantaneous phase  
396 differences and amplitudes within each single trial may have masked residual artifacts. Furthermore, in  
397 SASS, the sensor covariance matrix of physiological signals of interest is estimated from EEG data  
398 recorded in absence of stimulation. However, this covariance may be affected by AM-tACS via  
399 modulations of brain activity. Therefore, it cannot be ruled out that signal of interests are also attenuated  
400 when applying SASS during AM-tACS (e.g., entrained endogenous brain oscillations). Further studies  
401 are required to systematically assess this possibility. A similar issue may occur when SASS is  
402 precomputed and applied to novel data (Fig. S8). Due to time-varying covariances, robust online  
403 application of SASS will require methods for dynamically solving the eigenvalue problem and updating  
404 the spatial filter. This can be achieved by a recursive solution to the underlying eigenvalue problem,  
405 commonly used in real-time systems in other fields (Li et al., 2000). Future work will also need to include  
406 a comprehensive validation for other electrode montages, exploring how the spatial relationship of  
407 cortical sources and stimulation electrodes affects the performance of SASS. Finally, while in this work  
408 we strived to validate SASS for AM-tACS, application of SASS in combination with other stimulation  
409 protocols, e.g. conventional tACS, is also possible. However, depending on the magnitude of artifacts at  
410 the frequencies of interest, more signal components may have to be rejected reducing the dimensionality  
411 of data.

412

413 Despite these considerations, we have shown that SASS allows for successful recovery of single-trial  
414 SSVEP amplitude and phase during AM-tACS. Thereby, SASS now allows for further investigation of  
415 tACS-related network effects (Alekseichuk et al., 2019; Reinhart & Nguyen, 2019). SASS could also be  
416 used to purposefully modulate large-scale synchronization (Reinhart & Nguyen, 2019) by targeting one

417 cortical region as a function of another. Moreover, SASS may also help to better understand the  
418 underlying mechanisms of tACS effects. Recent studies suggest that tACS effects are not only mediated  
419 by electric field-dependent modulations of membrane potentials in superficial cortical layers, but may  
420 also involve transcutaneous stimulation of skin nerves (Asamoah, Khatoun, & Mc Laughlin, 2019). Here,  
421 SASS may help to identify the primary mechanism of action based on precise characterization of phase  
422 locking and phase lags in combination with other neurophysiological measures such as neural conduction  
423 times and cortico-cortical phase synchronization.

424  
425 Real-time phase estimation of ongoing brain oscillations is challenging and critically depends on the  
426 signal-to-noise ratio and instantaneous amplitude of the signal (Zrenner et al., 2020). It is thus important  
427 to note that successful implementation of adaptive AM-tACS not only requires real-time suppression of  
428 stimulation artifacts, but also stable phase estimation accuracy. This could be achieved by purposefully  
429 amplifying the target oscillation's amplitude using a cognitive task (e.g. motor imagery to increase  $\mu$ -  
430 rhythm amplitude) (Soekadar, Witkowski, Birbaumer, & Cohen, 2015; Soekadar, Witkowski, Cossio,  
431 Birbaumer, & Cohen, 2014), sensory stimuli (e.g. visual flickers or vibrotactile stimulation), or operant  
432 conditioning (e.g. neurofeedback) (Ruddy et al., 2018).

433

## 434 **Data availability**

435 The data is publicly available on Mendeley Data: <https://data.mendeley.com/datasets/39n9zttp4t>.

436 The implementation of the novel algorithm (Stimulation Artifact Source Separation, SASS) is publicly  
437 available on GitHub: <https://github.com/davidhaslacher/sass>.

## 438 **Disclosures**

439 None.

## 440 **CRediT authorship contribution statement**

441 D.H., K.N., S.R.S., C.B. and S.E.R. were involved in the design of study, analysis and/or interpretation  
442 of data, drafting the manuscript, and revising the manuscript critically for important intellectual  
443 content. D.H. and K.N. acquired the data.

## 444 Acknowledgements

445 This work was supported in part by the European Research Council (ERC) under the project NGBMI  
446 (759370), the Baden-Württemberg Stiftung (NEU007/1) and Einstein Stiftung Berlin. SRS received  
447 special support by the Brain & Behavior Research Foundation as 2017 NARSAD Young Investigator  
448 Grant recipient and P&S Fund Investigator.

449

## 450 5. References

- 451 Alekseichuk, I., Falchier, A. Y., Linn, G., Xu, T., Milham, M. P., Schroeder, C. E., & Opitz, A. (2019).  
452 Electric field dynamics in the brain during multi-electrode transcranial electric stimulation. *Nat*  
453 *Commun*, *10*(1), 2573. doi:10.1038/s41467-019-10581-7
- 454 Asamoah, B., Khatoun, A., & Mc Laughlin, M. (2019). tACS motor system effects can be caused by  
455 transcutaneous stimulation of peripheral nerves. *Nat Commun*, *10*(1), 266. doi:10.1038/s41467-  
456 018-08183-w
- 457 Chander, B. S., Witkowski, M., Braun, C., Robinson, S. E., Born, J., Cohen, L. G., . . . Soekadar, S. R.  
458 (2016). tACS Phase Locking of Frontal Midline Theta Oscillations Disrupts Working Memory  
459 Performance. *Front Cell Neurosci*, *10*, 120. doi:10.3389/fncel.2016.00120
- 460 Clancy, K. J., Baisley, S. K., Albizu, A., Kartvelishvili, N., Ding, M., & Li, W. (2018). Lasting  
461 connectivity increase and anxiety reduction via transcranial alternating current stimulation. *Soc*  
462 *Cogn Affect Neurosci*, *13*(12), 1305-1316. doi:10.1093/scan/nsy096
- 463 Fell, J., Klaver, P., Lehnertz, K., Grunwald, T., Schaller, C., Elger, C. E., & Fernandez, G. (2001). Human  
464 memory formation is accompanied by rhinal-hippocampal coupling and decoupling. *Nat*  
465 *Neurosci*, *4*(12), 1259-1264. doi:10.1038/nn759
- 466 Fries, P., Schroder, J. H., Roelfsema, P. R., Singer, W., & Engel, A. K. (2002). Oscillatory neuronal  
467 synchronization in primary visual cortex as a correlate of stimulus selection. *J Neurosci*, *22*(9),  
468 3739-3754. doi:20026318
- 469 Gramfort, A., Luessi, M., Larson, E., Engemann, D. A., Strohmeier, D., Brodbeck, C., . . . Hämäläinen,  
470 M. (2013). MEG and EEG data analysis with MNE-Python. *Front Neurosci*, *7*, 267.  
471 doi:10.3389/fnins.2013.00267
- 472 Helfrich, R. F., Schneider, T. R., Rach, S., Trautmann-Lengsfeld, S. A., Engel, A. K., & Herrmann, C.  
473 S. (2014). Entrainment of brain oscillations by transcranial alternating current stimulation. *Curr*  
474 *Biol*, *24*(3), 333-339. doi:10.1016/j.cub.2013.12.041
- 475 Hipp, J. F., Engel, A. K., & Siegel, M. (2011). Oscillatory synchronization in large-scale cortical  
476 networks predicts perception. *Neuron*, *69*(2), 387-396. doi:10.1016/j.neuron.2010.12.027
- 477 Kahana, M. J., Sekuler, R., Caplan, J. B., Kirschen, M., & Madsen, J. R. (1999). Human theta oscillations  
478 exhibit task dependence during virtual maze navigation. *Nature*, *399*(6738), 781-784.  
479 doi:10.1038/21645
- 480 Kasten, F. H., & Herrmann, C. S. (2019). Recovering Brain Dynamics During Concurrent tACS-M/EEG:  
481 An Overview of Analysis Approaches and Their Methodological and Interpretational Pitfalls.  
482 *Brain Topogr*, *32*(6), 1013-1019. doi:10.1007/s10548-019-00727-7
- 483 Kasten, F. H., Negahbani, E., Fröhlich, F., & Herrmann, C. S. (2018). Non-linear transfer characteristics  
484 of stimulation and recording hardware account for spurious low-frequency artifacts during  
485 amplitude modulated transcranial alternating current stimulation (AM-tACS). *Neuroimage*, *179*,  
486 134-143. doi:10.1016/j.neuroimage.2018.05.068

- 487 Kohli, S., & Casson, A. J. (2019). Removal of gross artifacts of transcranial alternating current  
488 stimulation in simultaneous EEG monitoring. *Sensors*, *19*(1), 190.
- 489 Kopell, N., Ermentrout, G. B., Whittington, M. A., & Traub, R. D. (2000). Gamma rhythms and beta  
490 rhythms have different synchronization properties. *Proc Natl Acad Sci U S A*, *97*(4), 1867-1872.  
491 doi:10.1073/pnas.97.4.1867
- 492 Li, W., Yue, H. H., Valle-Cervantes, S., & Qin, S. J. (2000). Recursive PCA for adaptive process  
493 monitoring. *Journal of process control*, *10*(5), 471-486.
- 494 Miltner, W. H., Braun, C., Arnold, M., Witte, H., & Taub, E. (1999). Coherence of gamma-band EEG  
495 activity as a basis for associative learning. *Nature*, *397*(6718), 434-436. doi:10.1038/17126
- 496 Negahbani, E., Kasten, F. H., Herrmann, C. S., & Fröhlich, F. (2018). Targeting alpha-band oscillations  
497 in a cortical model with amplitude-modulated high-frequency transcranial electric stimulation.  
498 *Neuroimage*, *173*, 3-12. doi:10.1016/j.neuroimage.2018.02.005
- 499 Neuling, T., Ruhnau, P., Weisz, N., Herrmann, C. S., & Demarchi, G. (2017). Faith and oscillations  
500 recovered: On analyzing EEG/MEG signals during tACS. *Neuroimage*, *147*, 960-963.  
501 doi:10.1016/j.neuroimage.2016.11.022
- 502 Nikulin, V. V., Nolte, G., & Curio, G. (2011). A novel method for reliable and fast extraction of neuronal  
503 EEG/MEG oscillations on the basis of spatio-spectral decomposition. *Neuroimage*, *55*(4), 1528-  
504 1535. doi:10.1016/j.neuroimage.2011.01.057
- 505 Noury, N., Hipp, J. F., & Siegel, M. (2016). Physiological processes non-linearly affect  
506 electrophysiological recordings during transcranial electric stimulation. *Neuroimage*, *140*, 99-  
507 109. doi:10.1016/j.neuroimage.2016.03.065
- 508 Noury, N., & Siegel, M. (2017a). Analyzing EEG and MEG signals recorded during tES, a reply.  
509 *Neuroimage*, *167*, 53-61. doi:10.1016/j.neuroimage.2017.11.023
- 510 Noury, N., & Siegel, M. (2017b). Phase properties of transcranial electrical stimulation artifacts in  
511 electrophysiological recordings. *Neuroimage*, *158*, 406-416.  
512 doi:10.1016/j.neuroimage.2017.07.010
- 513 Reinhart, R. M. G., & Nguyen, J. A. (2019). Working memory revived in older adults by synchronizing  
514 rhythmic brain circuits. *Nat Neurosci*, *22*(5), 820-827. doi:10.1038/s41593-019-0371-x
- 515 Rodriguez, E., George, N., Lachaux, J. P., Martinerie, J., Renault, B., & Varela, F. J. (1999). Perception's  
516 shadow: long-distance synchronization of human brain activity. *Nature*, *397*(6718), 430-433.  
517 doi:10.1038/17120
- 518 Roelfsema, P. R., Engel, A. K., Konig, P., & Singer, W. (1997). Visuomotor integration is associated  
519 with zero time-lag synchronization among cortical areas. *Nature*, *385*(6612), 157-161.  
520 doi:10.1038/385157a0
- 521 Ruddy, K., Balsters, J., Mantini, D., Liu, Q., Kassraian-Fard, P., Enz, N., . . . Wenderoth, N. (2018).  
522 Neural activity related to volitional regulation of cortical excitability. *Elife*, *7*.  
523 doi:10.7554/eLife.40843
- 524 Saramaeki, T., Mitra, S., & Kaiser, J. (1993). Finite impulse response filter design. *Handbook for digital*  
525 *signal processing*, *4*, 155-277.
- 526 Seager, M. A., Johnson, L. D., Chabot, E. S., Asaka, Y., & Berry, S. D. (2002). Oscillatory brain states  
527 and learning: Impact of hippocampal theta-contingent training. *Proc Natl Acad Sci U S A*, *99*(3),  
528 1616-1620. doi:10.1073/pnas.032662099
- 529 Smith, S. M., & Nichols, T. E. (2009). Threshold-free cluster enhancement: addressing problems of  
530 smoothing, threshold dependence and localisation in cluster inference. *Neuroimage*, *44*(1), 83-  
531 98. doi:10.1016/j.neuroimage.2008.03.061
- 532 Soekadar, S. R., Witkowski, M., Birbaumer, N., & Cohen, L. G. (2015). Enhancing Hebbian Learning  
533 to Control Brain Oscillatory Activity. *Cereb Cortex*, *25*(9), 2409-2415.  
534 doi:10.1093/cercor/bhu043

- 535 Soekadar, S. R., Witkowski, M., Cossio, E. G., Birbaumer, N., & Cohen, L. G. (2014). Learned EEG-  
536 based brain self-regulation of motor-related oscillations during application of transcranial electric  
537 brain stimulation: feasibility and limitations. *Front Behav Neurosci*, 8, 93.  
538 doi:10.3389/fnbeh.2014.00093
- 539 Thut, G., Bergmann, T. O., Fröhlich, F., Soekadar, S. R., Brittain, J. S., Valero-Cabré, A., . . . Herrmann,  
540 C. S. (2017). Guiding transcranial brain stimulation by EEG/MEG to interact with ongoing brain  
541 activity and associated functions: A position paper. *Clin Neurophysiol*, 128(5), 843-857.  
542 doi:10.1016/j.clinph.2017.01.003
- 543 Thut, G., Schyns, P. G., & Gross, J. (2011). Entrainment of perceptually relevant brain oscillations by  
544 non-invasive rhythmic stimulation of the human brain. *Front Psychol*, 2, 170.  
545 doi:10.3389/fpsyg.2011.00170
- 546 Uusitalo, M. A., & Ilmoniemi, R. J. (1997). Signal-space projection method for separating MEG or EEG  
547 into components. *Medical and Biological Engineering and Computing*, 35(2), 135-140.
- 548 Vosskuhl, J., Mutanen, T. P., Neuling, T., Ilmoniemi, R. J., & Herrmann, C. S. (2019). Signal-space  
549 projection suppresses the tACS artifact in EEG recordings. *bioRxiv*, 823153.
- 550 Wach, C., Krause, V., Moliadze, V., Paulus, W., Schnitzler, A., & Pollok, B. (2013). The effect of 10 Hz  
551 transcranial alternating current stimulation (tACS) on corticomuscular coherence. *Front Hum*  
552 *Neurosci*, 7, 511. doi:10.3389/fnhum.2013.00511
- 553 Witkowski, M., Garcia-Cossio, E., Chander, B. S., Braun, C., Birbaumer, N., Robinson, S. E., &  
554 Soekadar, S. R. (2016). Mapping entrained brain oscillations during transcranial alternating  
555 current stimulation (tACS). *Neuroimage*, 140, 89-98. doi:10.1016/j.neuroimage.2015.10.024
- 556 Zar, J. H. (1999). *Biostatistical analysis*: Pearson Education India.
- 557 Zrenner, C., Galevska, D., Nieminen, J. O., Baur, D., Stefanou, M.-I., & Ziemann, U. (2020). The shaky  
558 ground truth of real-time phase estimation. *Neuroimage*, 116761.  
559
- 560



561 **Supplementary Materials (prepared for submission as ‘Data in Brief’)**

562 **Fig. S1. Power spectrum of occipital sensors across all participants.**

563

564 **Fig. S2. Topography of mean single-trial steady-state visual evoked potentials (SSVEPs) amplitude**  
565 **across all participants.**

566

567 **Fig. S3. Amplitude of single-trial steady-state visual evoked potentials (SSVEPs) across all**  
568 **participants.**

569

570 **Fig. S4. Phase of single-trial steady-state visual evoked potentials (SSVEPs) (relative to flicker)**  
571 **across all participants.**

572

573 **Fig. S5. Assessment of possible nonlinear modulations of the amplitude-modulated transcranial**  
574 **alternating current stimulation (AM-tACS) artifact at the target frequency (10 Hz), e.g. by**  
575 **physiological activity (heartbeats).** After applying time- and frequency-domain analyses according to  
576 (Noury et al., 2016; Noury & Siegel, 2017b) around the AM-tACS target frequency (10 Hz) at channel  
577 O2, no artifacts neighboring the frequency of interest in the power spectrum or time domain could be  
578 detected (see Section 2.6).

579

580 **Fig. S6. Eigenvalue spectrum (a) and spatial patterns of first six rejected components (b) for each**  
581 **study participant.** The generalized eigenvalue is depicted above each component.

582

583 **Fig. S7. Topography of amplitude-modulated transcranial alternating current stimulation (AM-**  
584 **tACS) artifacts is frequency dependent.** AM-tACS artifacts, like tACS artifacts, appear at the  
585 stimulation frequency and its harmonics. However, the topography of the artifact is frequency-dependent  
586 (bottom), presumably due to spatially varying nonlinear transformations of the current by different  
587 capacitive effects at each electrode (Noury & Siegel, 2017b). Therefore, Stimulation Artifact Source  
588 Separation (SASS) should be computed separately for each frequency of interest.

589

590 **Fig. S8. Performance of Stimulation Artifact Source Separation (SASS) on novel data.**

591 SASS was computed on the first half of each AM-tACS dataset and tested on the second half.
